# Supplementary material for: Developing cognitive workload and performance evaluation models using functional brain network analysis
Source: PubMed Central journal article supplement (PMC10558559; doi:10.1038/s41514-023-00119-z), 2023-10-06
Supplement: 41514_2023_119_MOESM1_ESM.pdf [file 41514_2023_119_MOESM1_ESM.pdf]

**Supplementary table 1 Results of linear random intercept analysis for performance and cognitive workload evaluation at Matchboard levels 2 and 3 based on approach A (84 PSD features extracted from 116 EEG signals).**

| Performance, Matchboard 2, PSD features, Approach A                                                          |          |                |         |
|--------------------------------------------------------------------------------------------------------------|----------|----------------|---------|
| Predictors                                                                                                   | Estimate | Standard error | p-value |
| Average PSD in BA 45 at beta-band frequencies                                                                | -0.82    | 0.22           | < 0.001 |
| Subject was a significant random effect (p-value= 0.002); pseudo R <sup>2</sup> = 0.74; MAE=6.44; RMSE=8.83  |          |                |         |
| Cognitive workload, Matchboard 2, PSD features, Approach A                                                   |          |                |         |
| Predictors                                                                                                   | Estimate | Standard error | p-value |
| Average PSD in BA 40 at alpha-band frequencies                                                               | -0.41    | 0.12           | 0.002   |
| Subject was a significant random effect (p-value= 0.001); pseudo R <sup>2</sup> = 0.96; MAE=2.10; RMSE=2.96  |          |                |         |
| Performance, Matchboard 3, PSD features, Approach A                                                          |          |                |         |
| Predictors                                                                                                   | Estimate | Standard error | p-value |
| Average PSD in BA 20 at beta-band frequencies                                                                | -0.49    | 0.11           | < 0.001 |
| Subject was a significant random effect (p-value= 0.04); pseudo R <sup>2</sup> = 0.46; MAE=10.20; RMSE=12.94 |          |                |         |
| Cognitive workload, Matchboard 3, PSD features, Approach A                                                   |          |                |         |
| Predictors                                                                                                   | Estimate | Standard error | p-value |
| Average PSD in BA 45 at beta-band frequencies                                                                | 1.75     | 0.41           | < 0.001 |
| Subject was a significant random effect (p-value= 0.002); pseudo R <sup>2</sup> = 0.85; MAE=4.46; RMSE=6.69  |          |                |         |
